# Supplementary material for: pH-responsive copper-doped ZIF-8 MOF nanoparticles for enhancing the delivery and translocation of pesticides in wheat plants
Source: Royal Society of Chemistry journal article supplement (doi:10.1039/d3en00300k), 2023-01-01
Supplement: d3en00300k1.pdf [file d3en00300k1.pdf]

## Supporting Information

### **A pH-responsive copper doped ZIF-8 MOF nanoparticle for enhancing pesticide delivery and translocation in wheat plants**

Chunli Xu, Lidong Cao\*, Tingting Liu, Huiping Chen, Yuanbo Li\*

State Key Laboratory for Biology of Plant Diseases and Insect Pests, Institute of Plant Protection, Chinese Academy of Agricultural Sciences, Beijing, 100193, P. R. China

**\* Corresponding author:** Dr. Lidong Cao, Yuanbo Li.

Tel.: +86 10 62815938;

E-mail address: caolidong@caas.cn, liyuanbo@caas.cn.

### **Pesticide extraction and purification**

1.0 g of leaf (1 g of root) or 1 mL of solution samples were weighed into 10 mL polytetrafluoroethylene (PTFE) centrifuge tubes. Then, 1 ml water, 2.5 mL of ACN and 0.1 mL H<sub>3</sub>PO<sub>4</sub> were added and vortexed for 10 min with an oscillation frequency of 2500 min<sup>-1</sup>. For nutrient solutions samples, only 2.5 mL of ACN and 0.1 mL H<sub>3</sub>PO<sub>4</sub> were added for further pesticide extraction. Afterward, 1 g of NaCl was added to the tubes and vortexed for another 5 min. Subsequently, the tubes were centrifuged at 4000 rpm for 5 min. For nutrient solutions, the upper layer was directly transferred into an autosampler vial by passing through a 0.22- $\mu$ m PTFE membrane filter. For shoot and root samples, 1.2 mL of the upper layer was transferred into a 2 mL centrifuge tube containing 150 mg anhydrous MgSO<sub>4</sub> and sorbents (50 mg C18 + 25 mg GCB for leaf and 50 mg C18 for root). The tubes were then vortexed for 1 min and centrifuged at 5000 rpm for 5 min. The upper layer was also filtered through a 0.22- $\mu$ m PTFE membrane filter. The samples were stored at -20 °C before analysis.

### **UPLC-MS/MS Analysis**

AB 5500+ LC-MS/MS system (AB SCIEX, United States) was applied for quantitative analysis of fludioxonil. The system was equipped with an Phenomenex Kinetex Biphenyl column (2.6  $\times$  100 mm, 2.6  $\mu$ m particle size). The solvent system consisted of ACN (phase A) and 0.2 % FA in pure water (phase B). A gradient elution program was used with a flow rate of 0.4 mL/min: 0.5 min, 30% solvent A, 1.5 min, 90% solvent A, 4.0 min, 90% solvent A, 4.1 min, 30% solvent A, 5.0 min, 30% solvent A. The injection volume was 1  $\mu$ L, and the column temperature and temperature of the sample vial holder were 40°C and 4°C, respectively. The MS conditions were as

follows: ion spray voltages, 4500 V (Negative mode);  $m/z$  range, 50–1200 Da; accumulation time, 0.25 s; gas source 1 and gas source 2, 55 psi; curtain gas, 30 psi; source temperature, 500 °C; declustering potential (DP), -50 V. Multiple reaction monitoring (MRM) parameters for MS/MS analysis of fludioxonil are listed in Table S1.

### **Quality Assurance and Quality Control (QA and QC)**

Quality control was performed by regular analyses of procedural blanks, and solvent blanks were injected after each batch of 20 samples to monitor the background and instrumental contamination. A recovery test was conducted to verify the extraction efficiency, and the precision was represented by RSD within replicated samples. The test contained three spiked levels (1, 100, and 1000  $\mu\text{g}/\text{kg}$  for wheat leaf; 1, 10, and 1000  $\mu\text{g}/\text{kg}$  for wheat roots; 10, 100, and 1000  $\mu\text{g}/\text{L}$  for hydroponic solution). The mean recoveries and relative standard deviations (RSD) of the test were 87.3–106.3% and 1.1–16.2% in all samples, respectively (Table S2). The matrix-matched calibration standards were applied to quantify fludioxonil in different matrices, which were calculated based on the peak areas of the quantitative ion of fludioxonil. The correlation coefficients ( $R^2$ ) of the standard curves were all  $\geq 0.9916$  (Table S3). No fludioxonil was detected in the matrices and solvent blanks.

**Table S1.** Experimental parameters for fludioxonil in Multiple Reaction Monitoring (MRM) mode

| Pesticides  | Ion source | DP(V) | Qualitative ion /(m/z) | Collision Energy (V) | Dwell Time (s) |
|-------------|------------|-------|------------------------|----------------------|----------------|
| fludioxonil | ESI-       | -50   | 246.9/126.1            | -39.1                | 0.080          |
|             |            | -50   | 246.9/180.1            | -39.11               | 0.080          |

**Table S2.** Mean extraction efficiency (%) of fludioxonil in wheat and hydroponic solution with the relative standard deviation (%).

| Samples             | Spike level                                           | Mean recovery $\pm$ RSD (%) |
|---------------------|-------------------------------------------------------|-----------------------------|
|                     | ( $\mu\text{g}/\text{kg}$ or $\mu\text{g}/\text{L}$ ) | Roots                       |
| root                | 1                                                     | 87.3 $\pm$ 12.2             |
|                     | 10                                                    | 106.1 $\pm$ 3.5             |
|                     | 1000                                                  | 98.8 $\pm$ 7.7              |
| leaf                | 1                                                     | 84.7 $\pm$ 16.2             |
|                     | 100                                                   | 86.3 $\pm$ 1.6              |
|                     | 1000                                                  | 106.3 $\pm$ 3.2             |
| Hydroponic solution | 10                                                    | 91.5 $\pm$ 8.7              |
|                     | 100                                                   | 105.8 $\pm$ 1.6             |
|                     | 1000                                                  | 103.8 $\pm$ 1.1             |

**Table S3.** Matrix-matched calibrations and LOQ for fludioxonil

| Samples             | Regression equation   | R <sup>2</sup> | LOQ <sup>a</sup> ( $\mu\text{g}/\text{kg}$ or $\mu\text{g}/\text{L}$ ) |
|---------------------|-----------------------|----------------|------------------------------------------------------------------------|
| Shoot               | $y = 48713x + 335460$ | 0.9979         | 1                                                                      |
| root                | $y = 42415x + 678984$ | 0.9916         | 1                                                                      |
| Hydroponic solution | $y = 45756x + 459537$ | 0.9969         | 1                                                                      |

<sup>a</sup> LOQ represents the lowest spiked level of the validation meeting the method performance acceptability criteria.

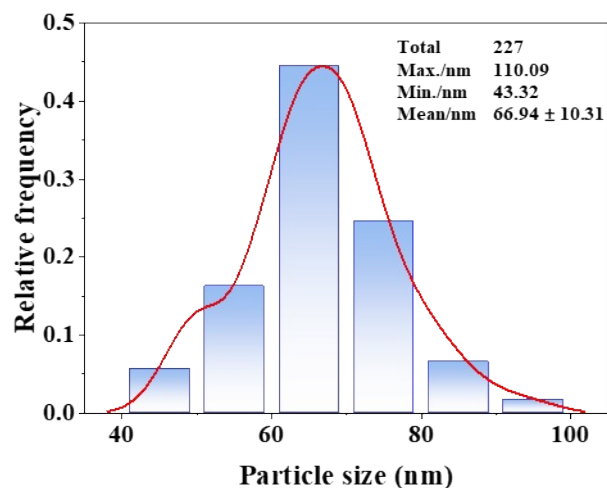

**Figure S1.** Size distributions determined by SEM for Cu@ZIF-8 crystal.

To further explore the pH-responsive behaviors of copper doped ZIF-8 nanoparticles, the morphology change of the nanoparticles was studied by putting them in the solutions with the pH values ranging from 3 to 9, respectively. The SEM images of Cu@ZIF-8 and ZIF-8 nanoparticles (Fig. S2) showed that the nanoparticles were regular and monodispersed. After 24 h of incubation, the morphologies of Cu@ZIF-8 nanoparticles remained almost unchanged in solution at pH 9, which was similar to those of ZIF-8. When incubated at pH 3-7, the Cu@ZIF-8 nanoparticles significantly changed and became amorphous or smaller. These results clearly demonstrated that Cu@ZIF-8 nanoparticles have acid sensitive characteristic, which endowed the cargo molecules with pH-responsive release behavior. Compared with Cu@ZIF-8, the morphology of ZIF-8 nanoparticles at pH 7 showed lighter collapse and deformation, suggesting that Cu@ZIF-8 nanoparticles are more pH-sensitive than ZIF-8 MOF nanoparticles.

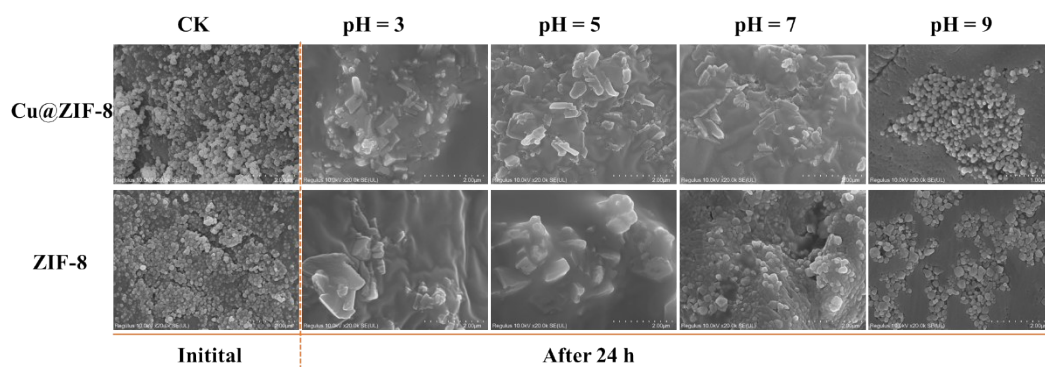

Figure S2. SEM images of Cu@ZIF-8 and ZIF-8 nanoparticles after incubation in aqueous solutions at different pH values for 24 h.

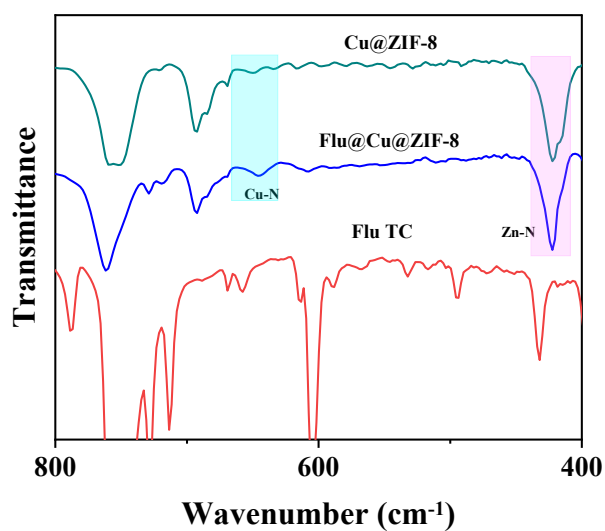

Figure S3. FTIR characterizations of samples.

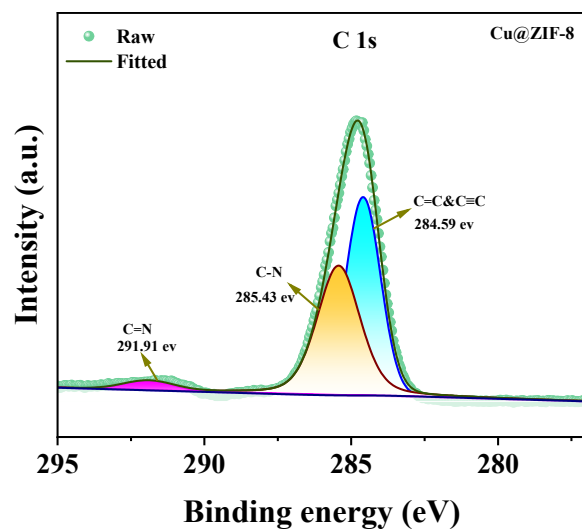

Figure S4. C 1s spectra of Cu@ZIF-8 NPs.

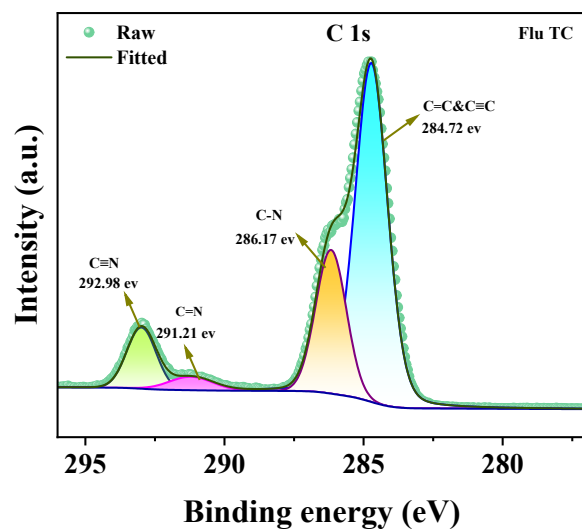

Figure S5. C 1s spectra of Flu TC.

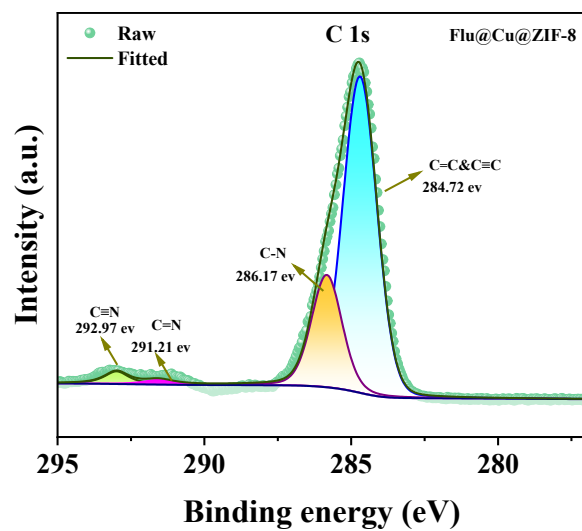

Figure S6. C 1s spectra of Flu@Cu@ZIF-8 NPs.

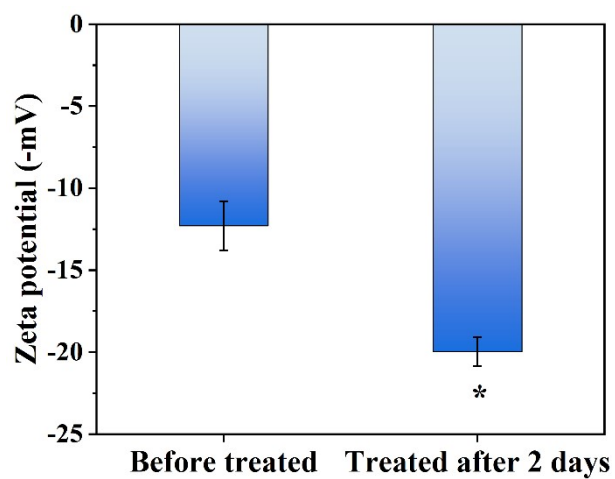

Figure S7. Zeta potential of FITC labeled Cu@ZIF-8 NPs.



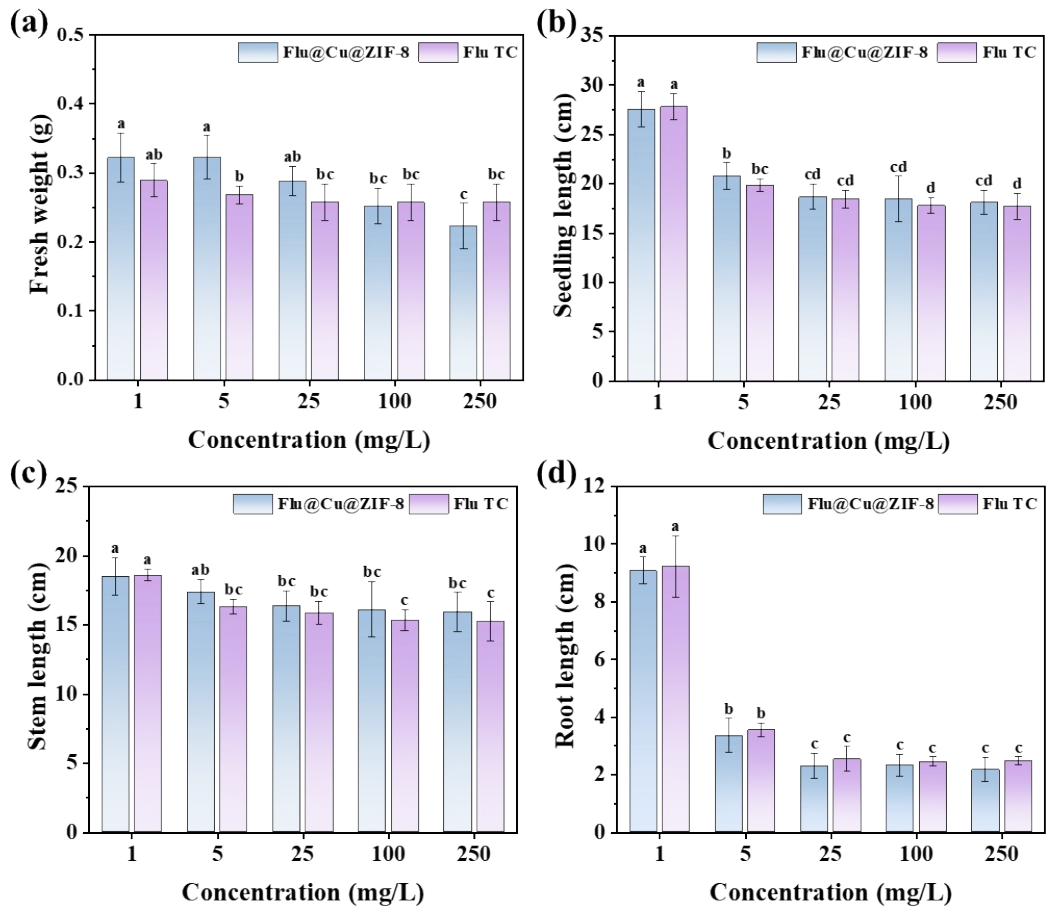

**Figure S8.** Effects of root treatment of Flu@Cu@ZIF-8 and Flu TC on fresh weight (a), and seedling length (b), root length (c), and stem length (d) of wheat plant. Different letters indicate a statistically significant difference by ANOVA ( $P < 0.05$ ).
